# Supplementary material for: Airborne observation of aerosol optical depth during ARCTAS: vertical profiles, inter-comparison and fine-mode fraction
Source: Copernicus journal article supplement (doi:10.5194/acp-11-3673-2011), 2011-04-20
Supplement: Supplementary file 1 [file acp-11-3673-2011-supplement.pdf]

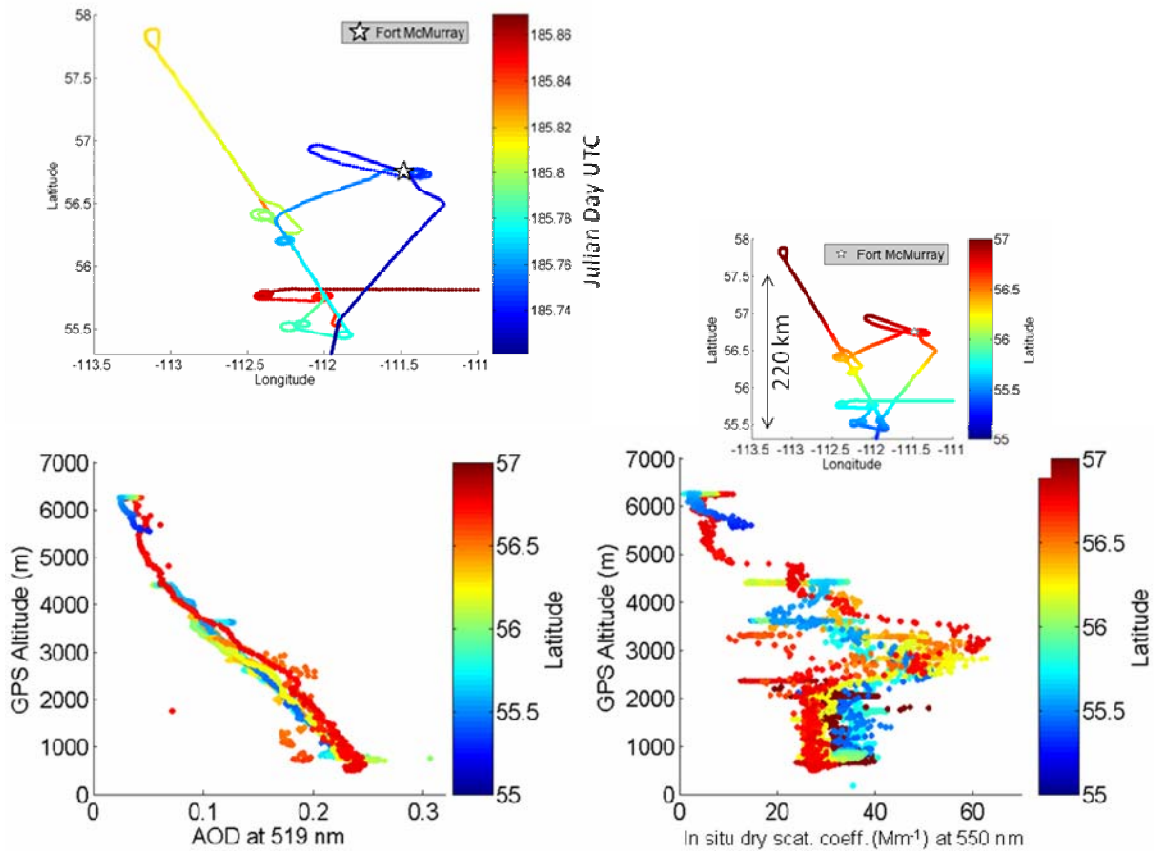

1

2 Supplementary Figure S1. Mid-visible AOD and scattering coefficient profiles near Fort  
 3 McMurray during the first half of the July 3 flight. The P-3 aircraft encountered a well-mixed  
 4 local pollution layer up to ~2 km GPS altitude and a long-range transport air mass above, both  
 5 homogenous over >200 km.

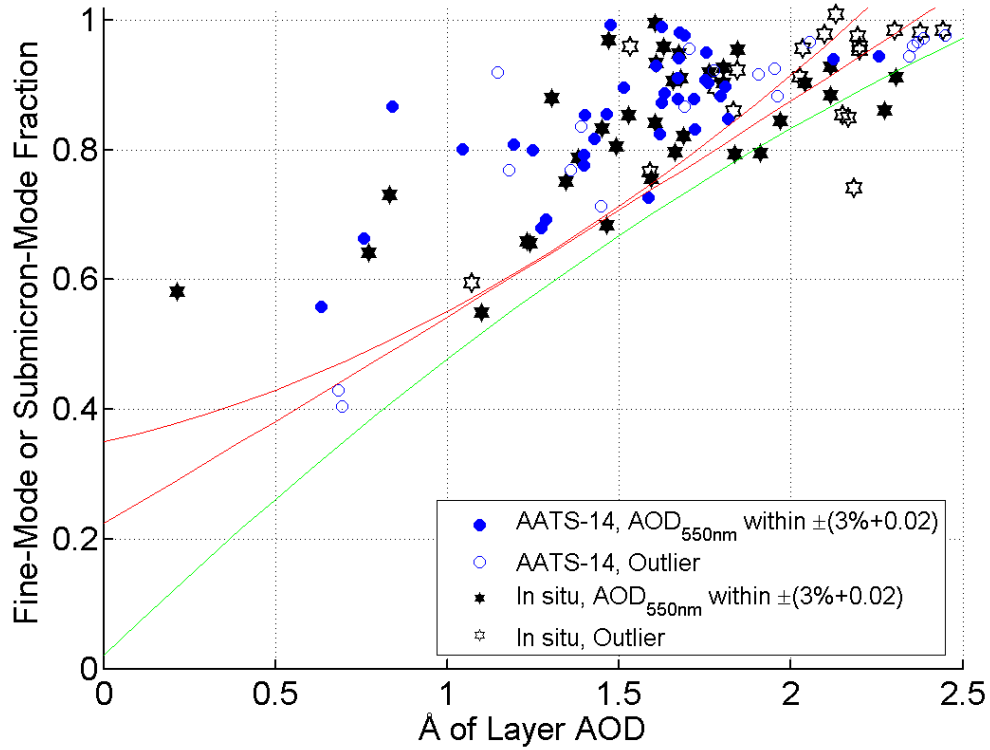

1  
 2 Supplementary Figure S2. Blue circles indicate the fine-mode fraction (at 500 nm) of  
 3 AATS-14 derived layer AOD (also shown in Figure 8a) compared with Angstrom exponent  
 4 of the layer AODs derived from AATS-14 (also shown in Figure 7a). Black hexagrams  
 5 indicate the submicron-mode fraction of in situ derived layer AOD adjusted to 500 nm (also  
 6 shown in Figure 8a) compared with Angstrom exponent of the layer AODs derived from the  
 7 in situ instruments (also shown in Figure 7a). The Angstrom exponents are at 550 nm. The  
 8 green and red curves indicate results from East Asia (Anderson et al., 2005) and Mexico  
 9 (Redemann et al., 2009b), respectively.

10
